# Supplementary material for: Magnetic nanocomposites based on Zn,Al-LDH intercalated with citric and EDTA groups for the removal of U(vi) from environmental and wastewater: synergistic effect and adsorption mechanism study
Source: Royal Society of Chemistry journal article supplement (doi:10.1039/d2ra05503a), 2022-01-01
Supplement: d2ra05503a1.pdf [file d2ra05503a1.pdf]

# Electronic Supplementary Information

**Magnetic Nanocomposites based on Zn,Al-LDH intercalated with Citric and EDTA groups for the removal of U(VI) from environmental and wastewater:**

**Synergistic Effect and Adsorption Mechanism Study**

*Natalia Kobylinska\*, Liubov Puzyrnaya, Galina Pshinko  
Dumansky Institute of Colloid and Water Chemistry,  
National Academy of Sciences of Ukraine,  
42 Akad. Vernads'koho Blvd., Kyiv, 03142, Ukraine*

*Corresponding author: Dr. Natalia Kobylinska*

*e-mail: kobilinskaya@univ.kiev.ua*

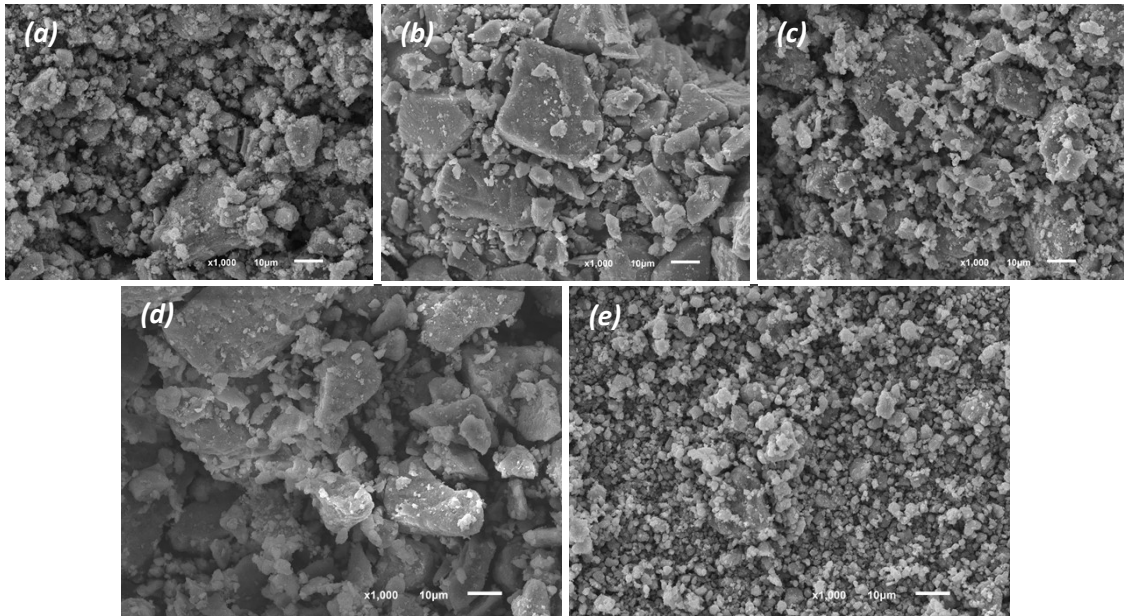

**Fig. S1.** SEM images of bare  $Fe_3O_4$  (a),  $Zn,Al$ -LDH/Cit (b),  $Fe_3O_4/Zn,Al$ -LDH/Cit (c),  $Zn,Al$ -LDH/EDTA (d) and  $Fe_3O_4/Zn,Al$ -LDH/EDTA (e) samples.

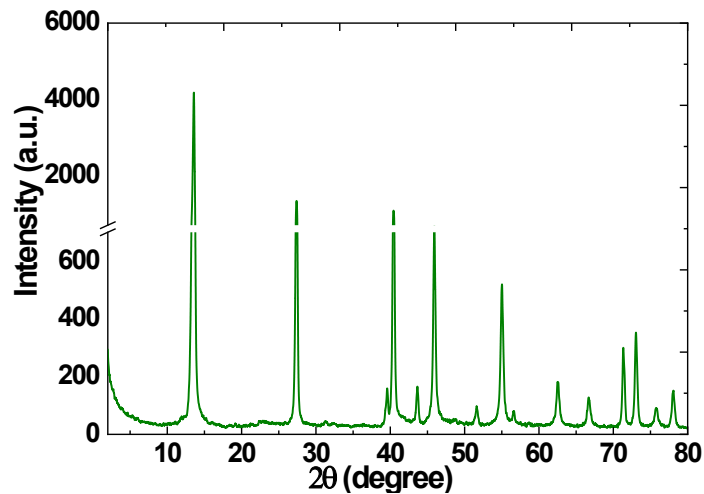

**Fig. S2.** XRD pattern of initial  $Zn,Al$ -LDH/ $CO_3$  sample.

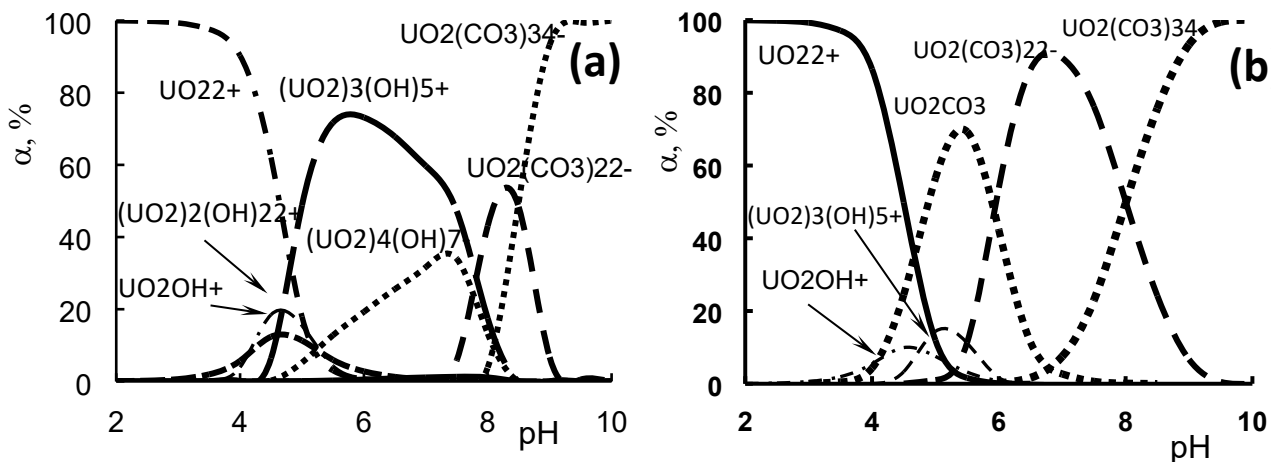

**Fig. S3.** The effect pH on the distribution of U(VI) forms in aqueous solution containing various concentrations of  $CO_3^{2-}$  ions: 0.01 mmol/L (a) i 5.0 mmol/L (b). (Conditions:  $C(U(VI)) = 0.1$  mmol/L, calculated with MEDUZA).

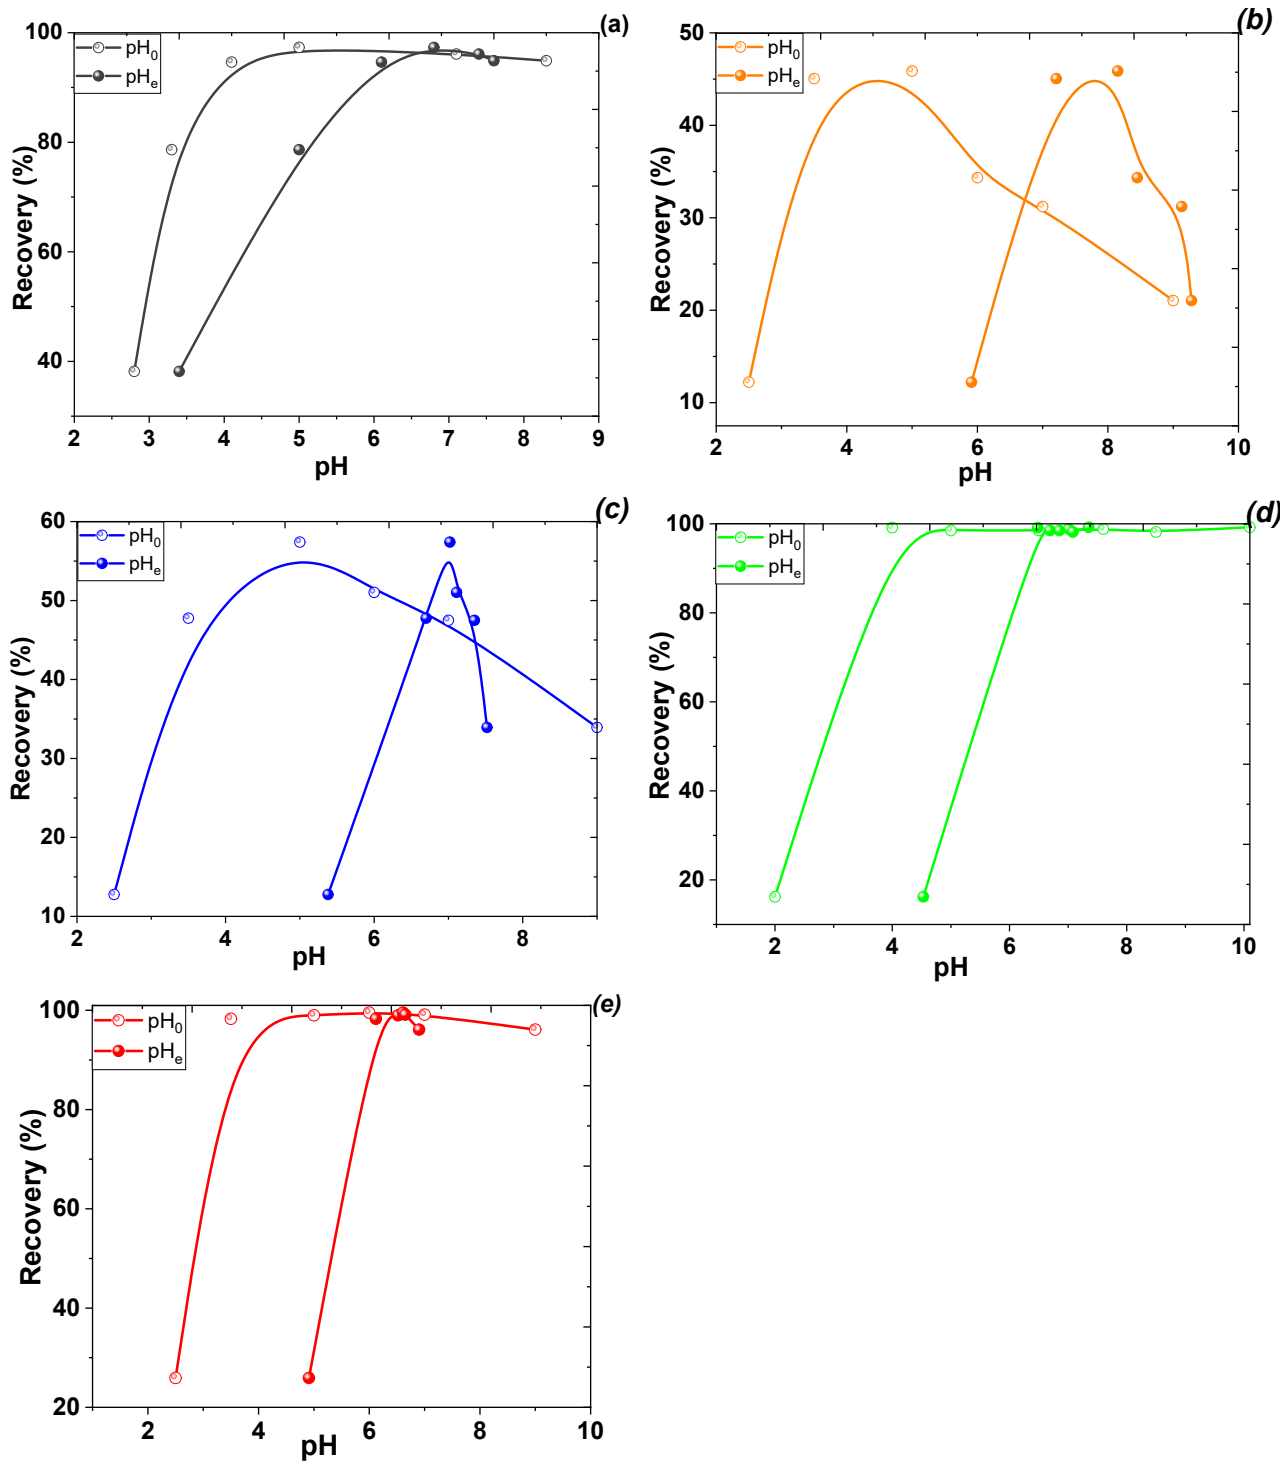

**Fig. S4.** Effect of initial ( $pH_0$ , a) and equilibrium ( $pH_e$ , b) pH on U(VI) removal by obtained samples: prictine  $Fe_3O_4$  (a),  $Zn,Al-LDH/Cit$  (b),  $Fe_3O_4/Zn,Al-LDH/Cit$  (c),  $Zn,Al-LDH/EDTA$  (d) and  $Fe_3O_4/Zn,Al-LDH/EDTA$  (Conditions:  $C_0(U(VI)) = 0.1 \text{ mol/L}$ ,  $V/m = 500 \text{ cm}^3/\text{g}$ , time 1 h).

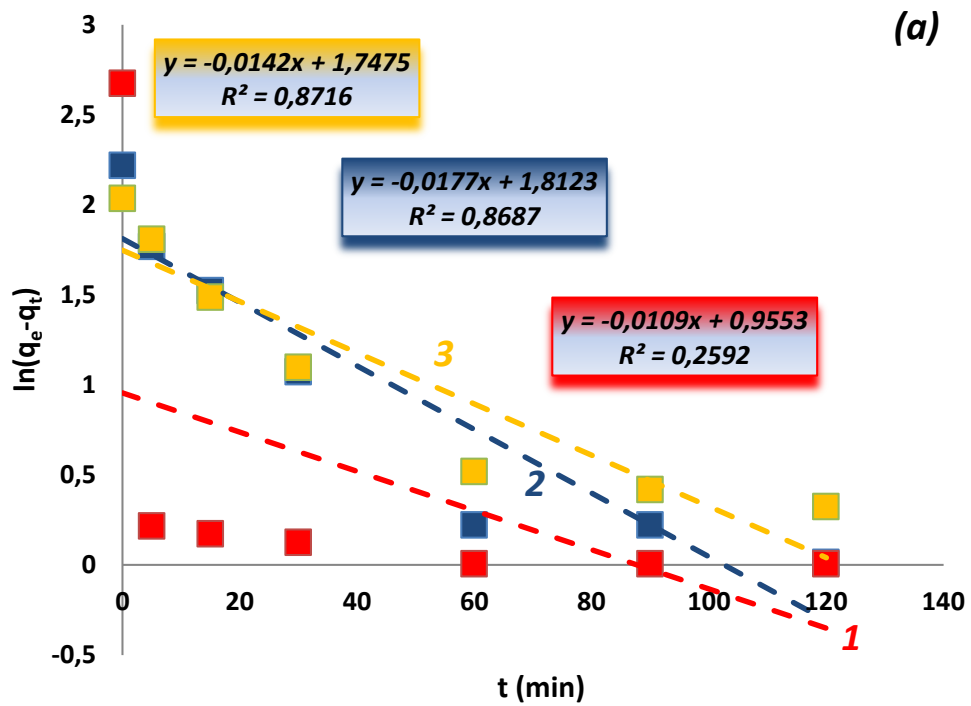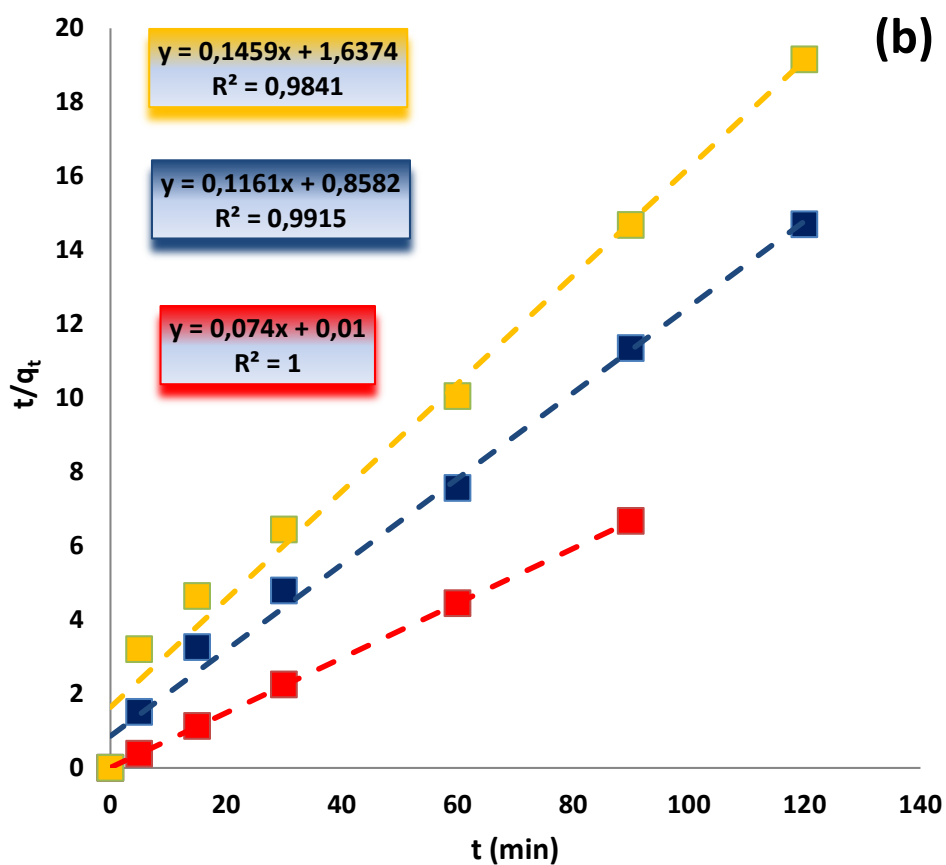

**Fig. S5.** Pseudo-first-order (a) and pseudo-second-order (b) kinetic plots for Uu(VI) adsorption onto  $Fe_3O_4/Zn,Al-LDH/EDTA$  (1),  $Fe_3O_4/Zn,Al-LDH/Cit$  (2) and  $Zn,Al-LDH/Cit$  (3).

**Table. S1.** Equilibrium constants of U(VI) with Citrate and EDTA ligands in aqueous solution [1].

| Equilibrium reactions                                                                       | $\log_{10}\beta$ | Remarks/Conversations                                                                                                                                                                                                                                                                                                                                                 |
|---------------------------------------------------------------------------------------------|------------------|-----------------------------------------------------------------------------------------------------------------------------------------------------------------------------------------------------------------------------------------------------------------------------------------------------------------------------------------------------------------------|
| $(U(VI)O_2)^{2+} + (EDTA)^{4-} \leftrightarrow U(VI)O_2EDTA^{2-}$                           | 10.9028          | Original data for $\beta$ : $\log_{10}\beta = 9.28$ , at $I=1.0$ M                                                                                                                                                                                                                                                                                                    |
| $H^+ + (U(VI)O_2)^{2+} + (EDTA)^{4-} \leftrightarrow (U(VI)O_2)H(EDTA)^{-}$                 | 19.62945         | $(UO_2) + HL \leftrightarrow (UO_2)HL \log_{10}\beta = 7.40$ , $I=1.0$ M<br>$H + L \leftrightarrow HL \log_{10}\beta = 10.09370$ , $I=1.0$ M<br>$(UO_2) + H + L \leftrightarrow (UO_2)HL \log_{10}\beta = 17.49370$ , $I=1.0$ M<br>$I = 0$ M: $\log_{10}\beta = 19.62945$                                                                                             |
| $2(U(VI)O_2)^{2+} + (EDTA)^{4-} \leftrightarrow (U(VI)O_2)_2EDTA (aq)$                      | 20.43290         | Original data for $\beta$ : $\log_{10}\beta = 17.87$ , at $I=1.0$ M                                                                                                                                                                                                                                                                                                   |
| $2(U(VI)O_2)^{2+} + (OH)^{-} + (EDTA)^{4-} \leftrightarrow (U(VI)O_2)_2EDTA(OH)^{-}$        | 29.41674         | $(UO_2)_2L \leftrightarrow (UO_2)_2(OH)L + H \log_{10}\beta = -4.81$ , $I=1.0$ M<br>$2(UO_2) + L \leftrightarrow (UO_2)_2L \log_{10}\beta = 17.99498$ , $I=1.0$ M<br>$OH + H \leftrightarrow H_2O \log_{10}\beta = 13.79384$ , $I=1.0$ M<br>$2(UO_2) + L \leftrightarrow (UO_2)_2L_2 \log_{10}\beta = 26.97882$ , $I=1.0$ M<br>$I = 0$ M: $\log_{10}\beta = 29.41674$ |
| $2(U(VI)O_2)^{2+} + 2(EDTA)^{4-} \leftrightarrow (U(VI)O_2)_2(EDTA)_2^{4-}$                 | 29.33290         | $(UO_2)_2L + L \leftrightarrow (UO_2)_2L_2 + H \log_{10}\beta = 8.90$ , $I=1.0$ M<br>$2(UO_2) + L \leftrightarrow (UO_2)_2L \log_{10}\beta = 17.99498$ , $I=1.0$ M<br>$2(UO_2) + 2L \leftrightarrow (UO_2)_2L_2 \log_{10}\beta = 26.89498$ , $I=1.0$ M<br>$I = 0$ M: $\log_{10}\beta = 29.33290$                                                                      |
| $4(U(VI)O_2)^{2+} + 4OH^{-} + 2(EDTA)^{4-} \leftrightarrow (U(VI)O_2)_6(OH)_4(EDTA)_2^{4-}$ | 74.17224         | $4(UO_2) + 2L \leftrightarrow (UO_2)_2(OH)_4L_2 + 4H \log_{10}\beta = 15.34$ , $I=1.0$ M<br>$4OH + 4H \leftrightarrow 4H_2O \log_{10}\beta = 55.17536$ , $I=1.0$ M<br>$4(UO_2) + 2L + 4OH \leftrightarrow (UO_2)_4L_2 \log_{10}\beta = 70.5153$ , $I=1.0$ M<br>$I = 0$ M: $\log_{10}\beta = 74.17224$                                                                 |
| $6(U(VI)O_2)^{2+} + 4OH^{-} + 3(EDTA)^{4-} \leftrightarrow (U(VI)O_2)_6(OH)_4(EDTA)_3^{4-}$ | 95.57016         | $6(UO_2) + 3L \leftrightarrow (UO_2)_6(OH)_4L_3 + 4H \log_{10}\beta = 34.3$ , $I=1.0$ M<br>$4OH + 4H \leftrightarrow 4H_2O \log_{10}\beta = 55.17536$ , $I=1.0$ M<br>$6(UO_2) + 3L + 4OH \leftrightarrow (UO_2)_6(OH)_4L_3 \log_{10}\beta = 89.5$ , $I=1.0$ M<br>$I = 0$ M: $\log_{10}\beta = 95.57016$                                                               |
| $(U(VI)O_2)^{2+} + (Citrate)^{3-} \leftrightarrow (U(VI)O_2)(Citrate)^{-}$                  | 8.68145          | Original data for $\beta$ : $\log_{10}\beta = 7.4$ , at $I=0.1$ M                                                                                                                                                                                                                                                                                                     |
| $2(U(VI)O_2)^{2+} + 2(Citrate)^{3-} \leftrightarrow (U(VI)O_2)_2(Citrate)_2^{2-}$           | 21.21933         | Original data for $\beta$ : $\log_{10}\beta = 18.87$ , at $I=0.1$ M                                                                                                                                                                                                                                                                                                   |

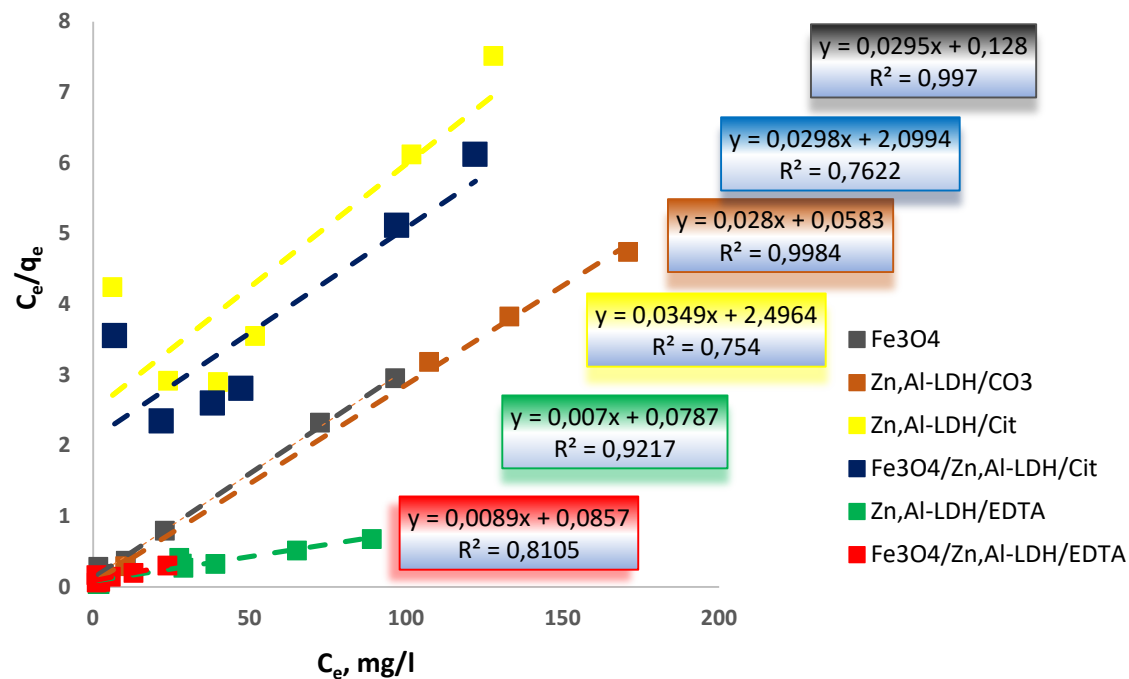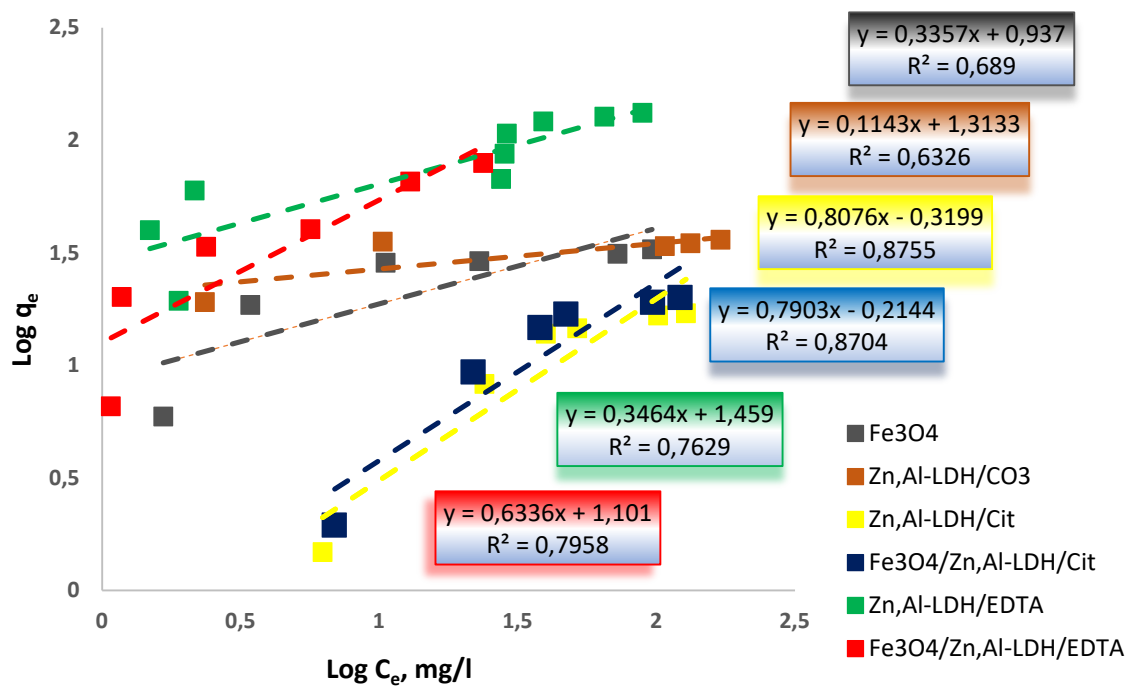

**Fig. S6.** Linear fitting of adsorption isotherms with Langmuir (a) and Freundlich (b) equations for U(VI) on obtained samples.

## Reference

1. Wilko Verweij, Jean-Pierre Simonin. Implementing the Mean Spherical Approximation Model in the Speciation Code CHEAQS Next at High Salt Concentrations. *Journal of Solution Chemistry* **2020**, 49 (11), 1319-1327. <https://doi.org/10.1007/s10953-020-01008-9>.
